# Supplementary material
Source: PubMed Central journal article supplement (PMC8530930)
Supplement: mmc1.pdf [file mmc1.pdf]

YMTHE, Volume 29

## **Supplemental Information**

**Targeting cholesterol biosynthesis promotes  
anti-tumor immunity by inhibiting long  
noncoding RNA SNHG29-mediated YAP activation**

**Wen Ni, Hui Mo, Yuanyuan Liu, Yuanyuan Xu, Chao Qin, Yunxia Zhou, Yuhui Li, Yuqing Li, Aijun Zhou, Su Yao, Rong Zhou, Jianping Huo, Liheng Che, and Jianming Li**

Figure S1

A

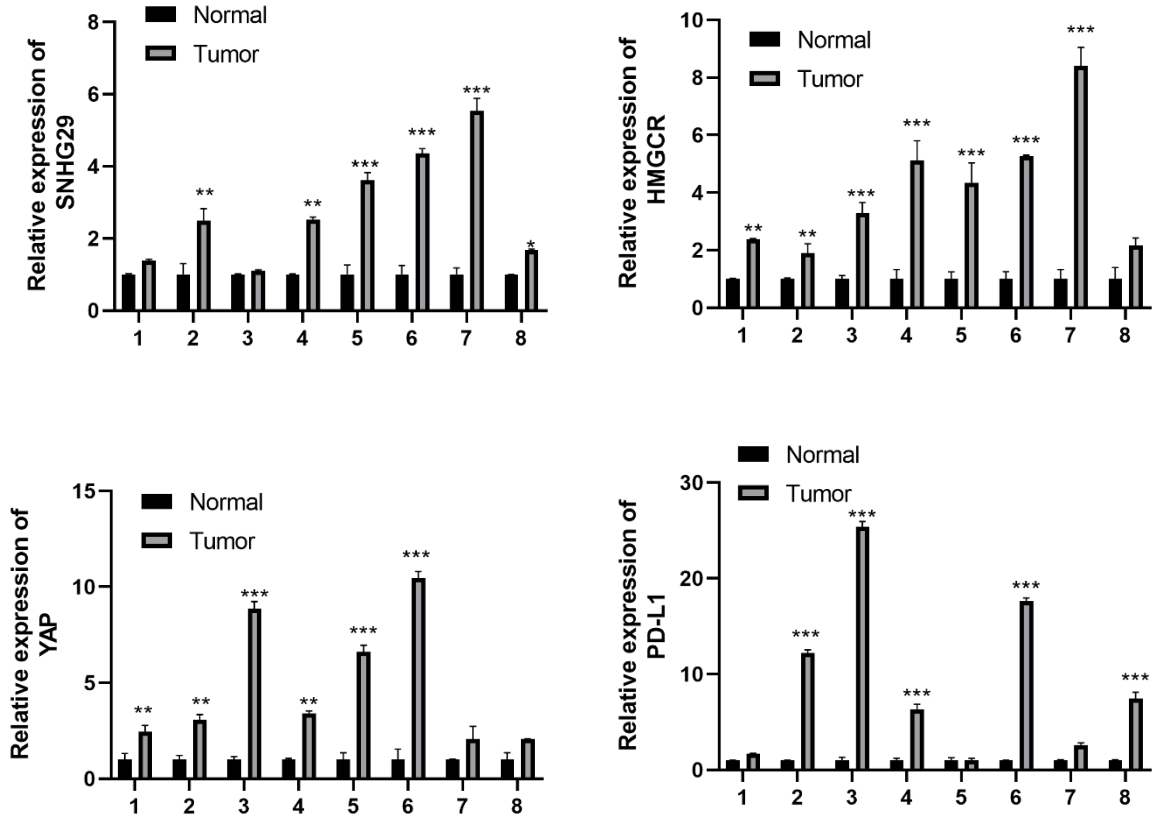

B

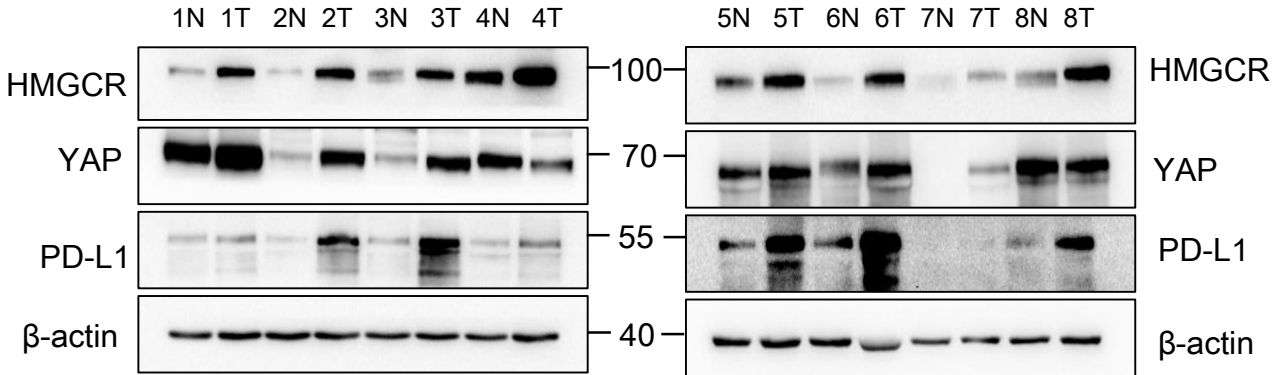

Figure S1. The expression of lncRNA SNHG29, HMGCRC, YAP and PD-L1 in CRC tumor tissues and adjacent normal counterparts. (A) qRT-PCR detection of genes expressions of SNHG29, HMGCRC, YAP and PD-L1. All experiments were performed in triplicate, and results are presented as mean  $\pm$  SD. \*\*p < 0.01, and \*\*\*p < 0.001 (B) Western blots analysis of the indicated protein expression in CRC tumor tissues and adjacent normal counterparts.

Figure S2

A

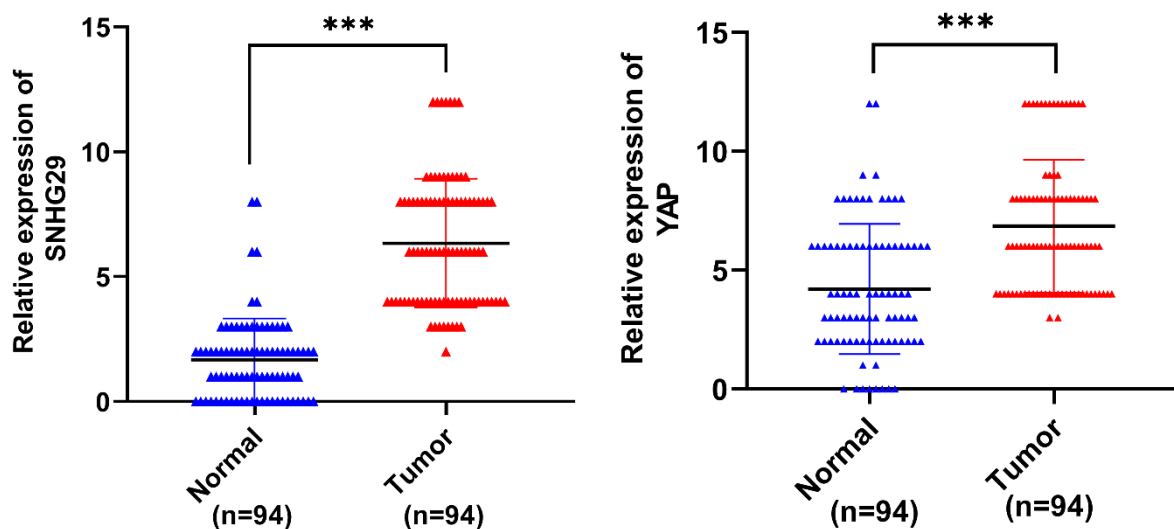

B

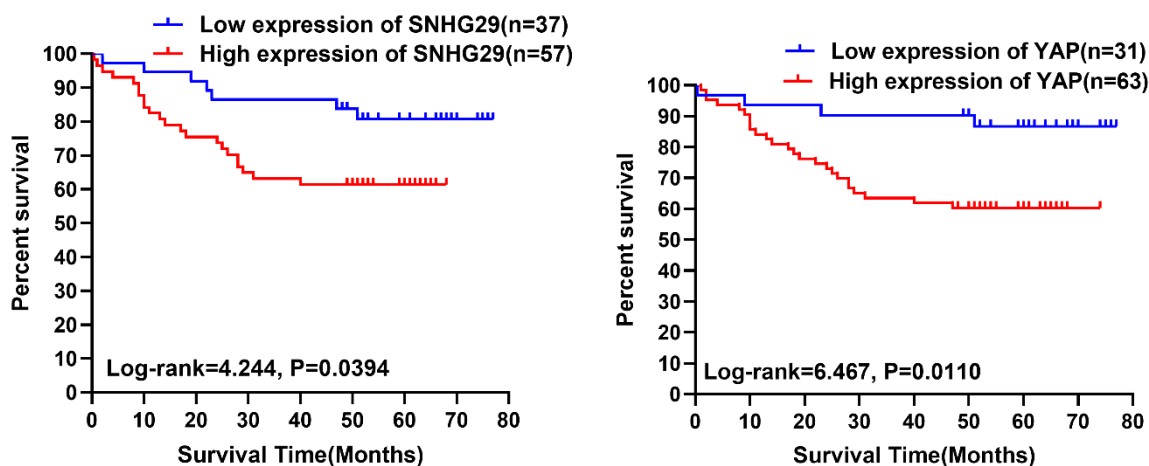

Figure S2. Survival curve of lncRNA SNHG29 and YAP in CRC patients. (A) Expressions of SNHG29 and YAP in CRC tumor tissues and adjacent normal counterparts. (B) Overall survival curve of SNHG29 and YAP expression in CRC patients. Median expression value of SNHG29 and YAP was selected as the threshold to divide CRC patients into high expression group and low expression group.

Figure S3

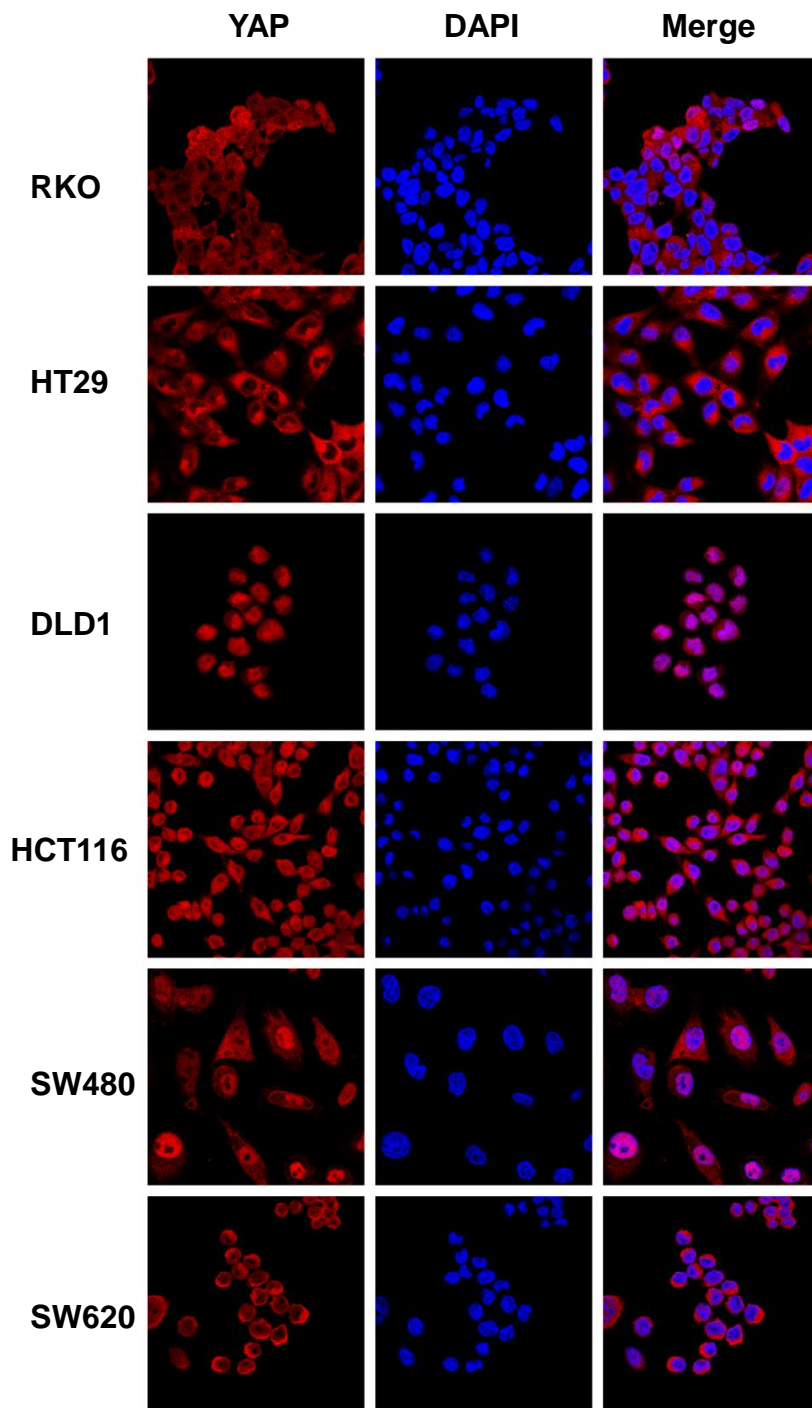

Figure S3. Immunofluorescence staining showed the localization of YAP in different CRC cells.

Figure S4

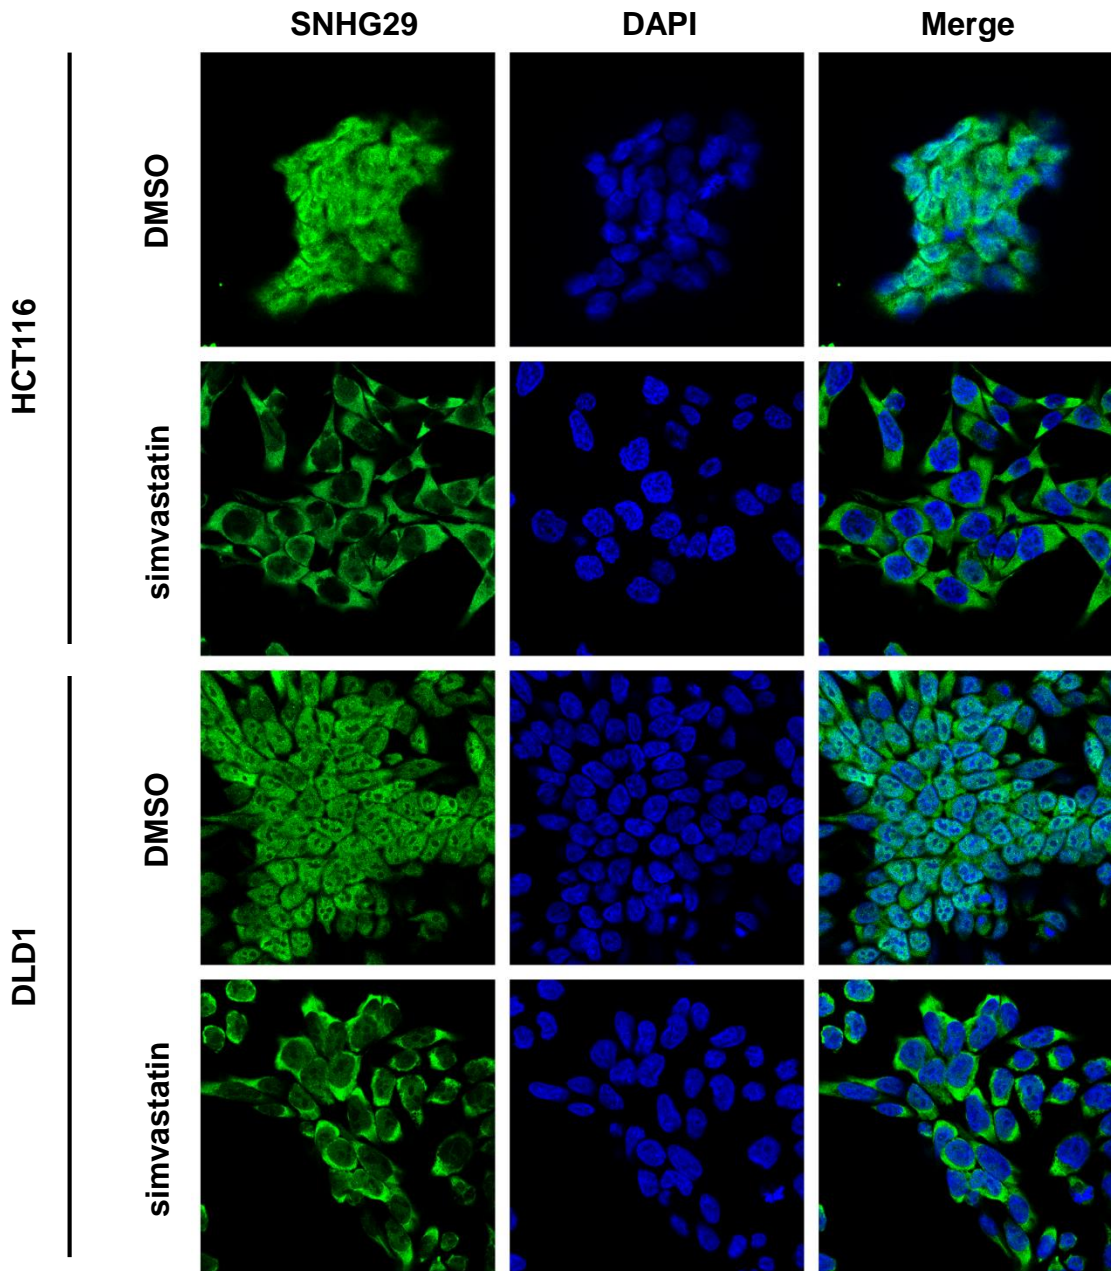

Figure S4. RNA FISH analysis show the subcellular location of lncRNA SNHG29 affected by simvastatin treatment in CRC cells.

# Figure S5

HCT116

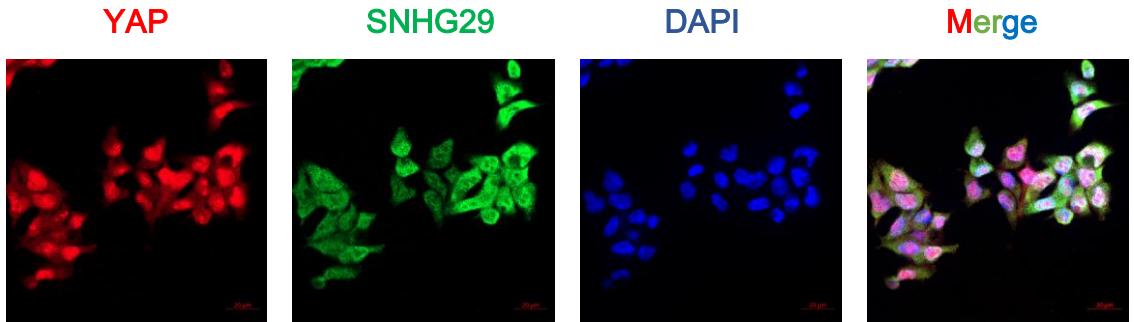

Figure S5. RNA FISH and immunofluorescence co-staining showed colocalization of SNHG29 and YAP in CRC cells.

Figure S6

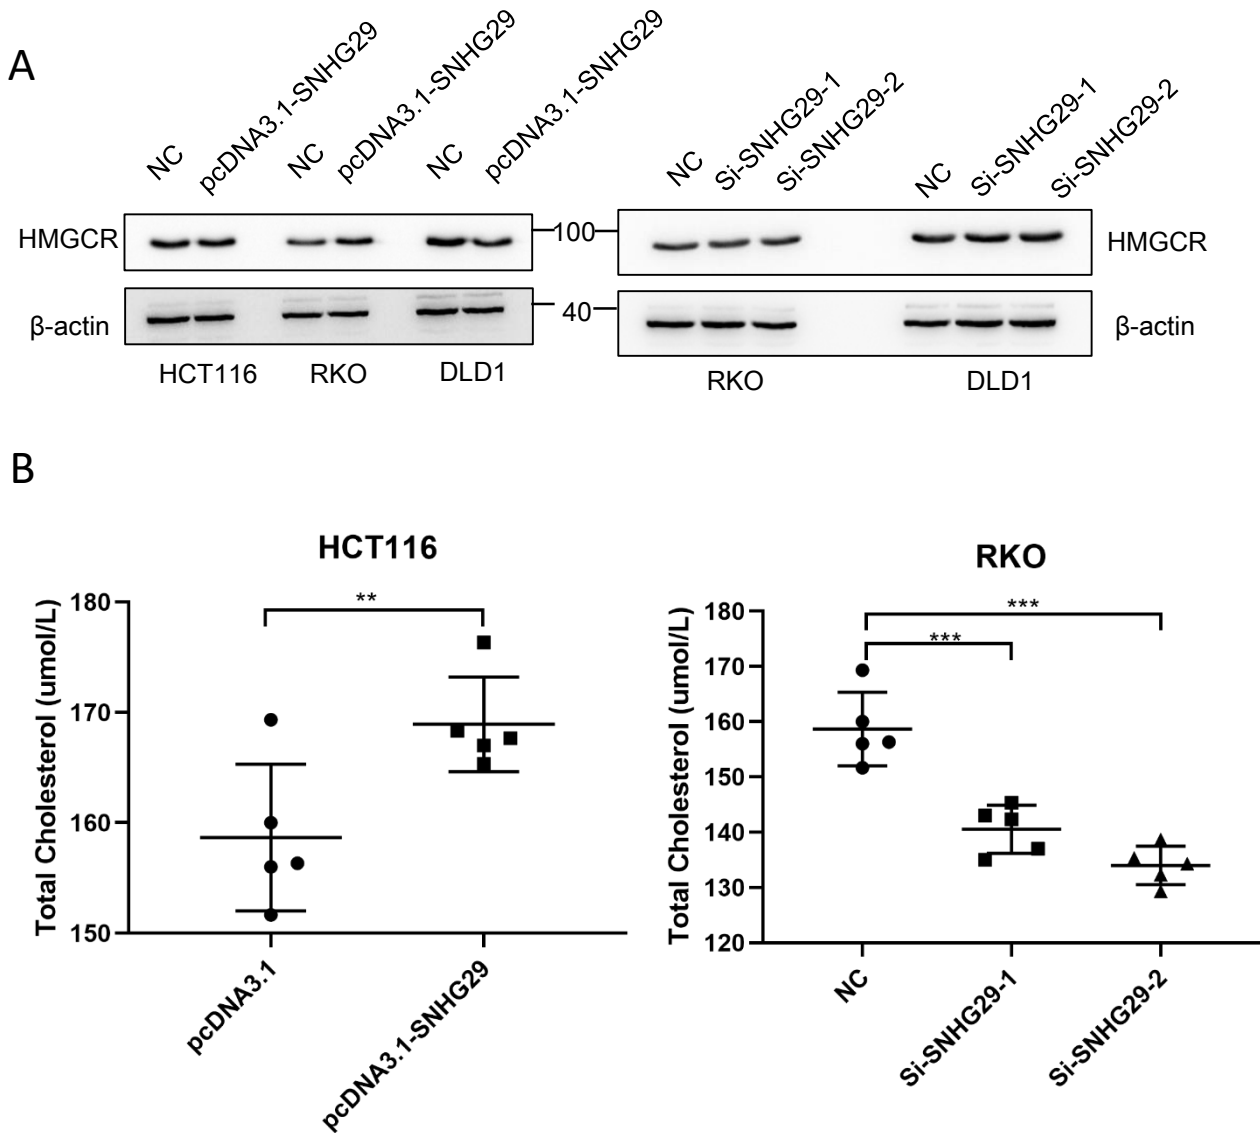

Figure S6. The HMGR levels (A) and cholesterol production (B) are examined in SNHG29 overexpression or knockdown CRC cells.

Table S5: Correlations between lncRNA SNHG29 express levels and clinicopathological features in 163 CRC cases

| Clinical character | Clinical group | All cases | lncRNA SNHG29 |     | $\chi^2$ | P value |
|--------------------|----------------|-----------|---------------|-----|----------|---------|
|                    |                |           | High          | Low |          |         |
| Age(Year)          | < 50           | 26        | 14            | 12  | 0.106    | 0.745   |
|                    | $\geq$ 50      | 137       | 91            | 46  |          |         |
| Gender             | Female         | 62        | 33            | 29  | 0.213    | 0.645   |
|                    | Male           | 101       | 50            | 51  |          |         |
| Pathological Grade | II             | 121       | 61            | 60  | 0.048    | 0.826   |
| AJCC stage         | I - II         | 59        | 32            | 27  | 0.407    | 0.523   |
|                    | III-IV         | 104       | 51            | 53  |          |         |
| LN involvement     | Yes            | 86        | 39            | 47  | 2.261    | 0.133   |
|                    | No             | 77        | 44            | 33  |          |         |
| Metastasis         | M0             | 106       | 58            | 48  | 1.748    | 0.186   |
|                    | M1             | 57        | 25            | 32  |          |         |

P value <0.05 was considered to indicate statistical significance. The P values were calculated in SPSS 19.0 using Pearson's chi-square test.

Table S6: Correlations between YAP express levels and clinicopathological features in 163 CRC cases

| Clinical character | Clinical group | All cases | YAP  |     | $\chi^2$ | P value |
|--------------------|----------------|-----------|------|-----|----------|---------|
|                    |                |           | High | Low |          |         |
| Age(Year)          | < 50           | 26        | 13   | 13  | 0.142    | 0.707   |
|                    | $\geq$ 50      | 137       | 60   | 77  |          |         |
| Gender             | Female         | 62        | 36   | 26  | 0.885    | 0.347   |
|                    | Male           | 101       | 51   | 50  |          |         |
| Pathological Grade | II             | 121       | 63   | 58  | 0.323    | 0.570   |
| AJCC stage         | I - II         | 59        | 29   | 30  | 0.662    | 0.416   |
|                    | III-IV         | 104       | 58   | 46  |          |         |
| LN involvement     | Yes            | 86        | 46   | 40  | 0.001    | 0.975   |
|                    | No             | 77        | 41   | 36  |          |         |
| Metastasis         | M0             | 106       | 59   | 47  | 0.637    | 0.425   |
|                    | M1             | 57        | 28   | 29  |          |         |

P value <0.05 was considered to indicate statistical significance. The P values were calculated in SPSS 19.0 using Pearson's chi-square test.



Table S7: Correlations between PD-L1 express levels and clinicopathological features in 163 CRC cases

| Clinical character | Clinical group | All cases | PD-L1 |     | $\chi^2$ | P value |
|--------------------|----------------|-----------|-------|-----|----------|---------|
|                    |                |           | High  | Low |          |         |
| Age(Year)          | < 50           | 26        | 17    | 9   | 0.645    | 0.212   |
|                    | $\geq 50$      | 137       | 83    | 54  |          |         |
| Gender             | Female         | 62        | 39    | 23  | 0.102    | 0.750   |
|                    | Male           | 101       | 61    | 40  |          |         |
| Pathological Grade | II             | 121       | 75    | 46  | 0.080    | 0.778   |
|                    | III            | 42        | 25    | 17  |          |         |
| AJCC stage         | I - II         | 59        | 42    | 17  | 3.773    | 0.052   |
|                    | III-IV         | 104       | 58    | 46  |          |         |
| LN involvement     | Yes            | 86        | 48    | 38  | 2.353    | 0.1625  |
|                    | No             | 77        | 52    | 25  |          |         |
| Metastasis         | M0             | 106       | 69    | 37  | 1.793    | 0.181   |
|                    | M1             | 57        | 31    | 26  |          |         |

P value <0.05 was considered to indicate statistical significance. The P values were calculated in SPSS 19.0 using Pearson's chi-square test.

**Table S8. Key Resources Table**

| REAGENT or RESOURCE                                                | SOURCE                    | IDENTIFIER       |
|--------------------------------------------------------------------|---------------------------|------------------|
| <b>Antibodies</b>                                                  |                           |                  |
| YAP (D8H1X) XP® rabbit mAb                                         | Cell Signaling Technology | Cat# 14074       |
| Rabbit monoclonal Anti-YAP1 antibody [EPR19812] (Alexa Fluor® 647) | abcam                     | Cat# ab225440    |
| PD-L1 (E1L3N®) XP® Rabbit mAb                                      | Cell Signaling Technology | Cat#13684        |
| Mouse PD-L1/B7-H1 Antibody (Mouse Specific)                        | R&D                       | Cat# AF1019      |
| LATS1 (C66B5) rabbit mAb                                           | Cell Signaling Technology | Cat#3477         |
| Anti-HMGCR antibody                                                | abcam                     | Cat# ab174830    |
| Phospho-YAP (Ser127) (D9W2I) rabbit mAb                            | Cell Signaling Technology | Cat#13008        |
| CTGF (D8Z8U) rabbit mAb                                            | Cell Signaling Technology | Cat#86641        |
| Ubiquitin (P4D1) mouse mAb                                         | Cell Signaling Technology | Cat#3936         |
| Beta Actin Monoclonal Antibody                                     | Proteintech               | Cat# 66009-1-Ig  |
| Rabbit polyclonal anti-GAPDH                                       | Proteintech               | Cat#10494-1-AP   |
| Mouse monoclonal anti-Lamin B1                                     | Proteintech               | Cat#66095-1-Ig   |
| Mouse polyclonal anti-Ki67                                         | ZSGB-BIO                  | Cat#ZM-0166      |
| CD8 $\alpha$ (C8/144B) Mouse mAb                                   | Cell Signaling Technology | Cat# 38553       |
| CD3 $\epsilon$ (D7A6E™) XP® Rabbit mAb                             | Cell Signaling Technology | Cat# 95194       |
| CD4 (D7D2Z) Rabbit mAb                                             | Cell Signaling Technology | Cat# 25229       |
| CD8- $\alpha$ (D4W2Z) XP® Rabbit mAb (Mouse Specific)              | Cell Signaling Technology | Cat# 98941       |
| Granzyme B (D6E9W) Rabbit mAb                                      | Cell Signaling Technology | Cat# 46890       |
| Granzyme B antibody                                                | ZSGB-BIO                  | Cat# ZA-0599-3.0 |
| PerCP/Cyanine5.5 anti-human CD86                                   | Biolegend                 | Cat# 305419      |
| FITC anti-human CD69                                               | Biolegend                 | Cat# 310904      |
| Ms CD25 BV786                                                      | BD                        | Cat# 564368      |
| Hu HLA-DR BV605                                                    | BD                        | Cat# 562845      |
| ANTI-HU CD14 61D3 FITC                                             | eBioscience               | Cat# 11-0149-42  |
| <b>Bacterial and Virus Strains</b>                                 |                           |                  |
| DH5alpha Competent E. coli                                         | TIANGEN                   | Cat#CB101        |
| <b>Chemicals, Peptides, and Recombinant Proteins</b>               |                           |                  |
| Cycloheximide                                                      | MedChemExpress            | Cat#HY-12320     |
| MG-132                                                             | Selleck                   | Cat#133407-82-6  |
| Actinomycin D                                                      | MedChemExpress            | Cat#HY-17559     |
| <b>Critical Commercial Assays</b>                                  |                           |                  |
| Magna RIP™ RNA-Binding Protein Immunoprecipitation Kit             | Millipore                 | Cat# 17-701      |
| PARIS™ Kit                                                         | Invitrogen                | Cat# AM1921      |

|                                                                |                                               |            |
|----------------------------------------------------------------|-----------------------------------------------|------------|
| SimpleChIP® Enzymatic Chromatin IP Kit (Magnetic Beads)        | Cell Signaling Technology                     | Cat#9003   |
| Dual-Glo® Luciferase Assay System                              | Promega                                       | Cat#E2920  |
| <b>Deposited Data</b>                                          |                                               |            |
| lncRNA-seq Raw data                                            | This paper                                    | SRP313172  |
| <b>Experimental Models: Cell Lines</b>                         |                                               |            |
| Human: DLD1                                                    | Cellcook Biotech Co.,Ltd.                     | Cat#CC0507 |
| Human: SW480                                                   | Cellcook Biotech Co.,Ltd.                     | Cat#CC0505 |
| Human: SW620                                                   | Cellcook Biotech Co.,Ltd.                     | Cat#CC0503 |
| Human: HCT116                                                  | Cellcook Biotech Co.,Ltd.                     | Cat#CC0506 |
| Human: RKO                                                     | Cellcook Biotech Co.,Ltd.                     | Cat#CC0501 |
| Human: HT29                                                    | Cellcook Biotech Co.,Ltd.                     | Cat#CC0504 |
| <b>Experimental Models: Organisms/Strains</b>                  |                                               |            |
| Mice: B-NDG nude                                               | BIOCYTOGEN                                    | N/A        |
| Mice: C57BL/6                                                  | Guangdong Medical Laboratory Animal Center    | N/A        |
| Mice: BALB/C nude                                              | Guangdong Medical Laboratory Animal Center    | N/A        |
| <b>Oligonucleotides</b>                                        |                                               |            |
| LNA™ ISH probe: SNHG29 (/5DigN/TGATGCTGATTCTTCACGAAT /3Dig_N/) | Exiqon                                        | 328067375  |
| YAP-F: TAGCCCTGCGTAGCCAGTTA                                    | The Beijing Genomics Institute                | N/A        |
| YAP-R: TCATGCTTAGTCCACTGTCTGT                                  | The Beijing Genomics Institute                | N/A        |
| SNHG29-F: CAGTCCCAAGGACCAGTAGC                                 | The Beijing Genomics Institute                | N/A        |
| SNHG29-R: CTGCTGAGCATGTCCTCTGA                                 | The Beijing Genomics Institute                | N/A        |
| CTGF-F: CAGCATGGACGTTCTGCTG                                    | The Beijing Genomics Institute                | N/A        |
| CTGF-R: AACCACGGTTTGGTCCTTGG                                   | The Beijing Genomics Institute                | N/A        |
| CYR61-F: CTCGCCTTAGTCGTCACCC                                   | The Beijing Genomics Institute                | N/A        |
| CYR61-R: CGCCGAAGTTGCATTCCAG                                   | The Beijing Genomics Institute                | N/A        |
| GAPDH-F: AGCTGAACGGGAAGCTCACT                                  | The Beijing Genomics Institute                | N/A        |
| GAPDH-R: TGCTTAGCCAAATTCGTTG                                   | The Beijing Genomics Institute                | N/A        |
| esiRNA target: YAP-1;F:GGUCAGAGAUACUUCUAAA                     | Shanghai Integrated Biotech Solutions Co.,Ltd | N/A        |

|                                                |                                               |     |
|------------------------------------------------|-----------------------------------------------|-----|
| R:UUAAGAAGUAUCUCUGACCAG                        | Shanghai Integrated Biotech Solutions Co.,Ltd | N/A |
| esiRNA target: YAP-2;F:GGUGAUACUAUCAACCAAAGC   | Shanghai Integrated Biotech Solutions Co.,Ltd | N/A |
| R:UUUGGUUGAUAGUAUCACCUG                        | Shanghai Integrated Biotech Solutions Co.,Ltd | N/A |
| esiRNA target: SNHG29-1;F:CGAGAGAACUGGGUUGCAAU | Shanghai Integrated Biotech Solutions Co.,Ltd | N/A |
| R: UUGCAACCCAGUUCUCUCGGG                       | Shanghai Integrated Biotech Solutions Co.,Ltd | N/A |
| esiRNA target: SNHG29-2;F:GUUGCAAUUCGUGAAGAAUU | Shanghai Integrated Biotech Solutions Co.,Ltd | N/A |
| R: UUCUUCACGAAUUUGCAACUU                       | Shanghai Integrated Biotech Solutions Co.,Ltd | N/A |
| siRNA(NC), F:UUCUCCGAACGUGUCACGUTT             | Shanghai Integrated Biotech Solutions Co.,Ltd | N/A |
| R:ACGUGACACGUUCGGAGAATT                        | Shanghai Integrated Biotech Solutions Co.,Ltd | N/A |
| <b>Recombinant DNA</b>                         |                                               |     |
| pcDNA3.1 (+) -YAP1-6xhis                       | Shanghai Integrated Biotech Solutions Co.,Ltd | N/A |
| pCDH-MSCV-MCS-EF1-GFP-puro-YAP1                | Shanghai Integrated Biotech Solutions Co.,Ltd | N/A |
| pcDNA3.1 (+) -SNHG29                           | Shanghai Integrated Biotech Solutions Co.,Ltd | N/A |
| pCDH-MSCV-MCS-EF1-GFP-puro-SNHG29              | Shanghai Integrated Biotech Solutions Co.,Ltd | N/A |
